# Supplementary material for: Designing pH-triggered drug release iron oxide nanocomposites for MRI-guided photothermal-chemoembolization therapy of liver orthotopic cancer
Source: Royal Society of Chemistry journal article supplement (doi:10.1039/c9bm00056a), 2019-01-01
Supplement: c9bm00056a1.pdf [file c9bm00056a1.pdf]

**Designing pH-Triggered Drug Release Iron Oxide Nanocomposites for MRI  
Guided Photothermal-Chemoembolization Therapy of Liver Orthotopic Cancer**

Fengyong Liu,<sup>\*a</sup> Xin Li,<sup>a</sup> Yangyang Li,<sup>\*bc</sup> Yuchen Qi,<sup>c</sup> Hongjun Yuan,<sup>a</sup> Jian He,<sup>c</sup> Wanlin  
Li,<sup>c</sup> and Min Zhou<sup>\*bcd</sup>

<sup>a</sup> Department of Interventional Radiology, The First Medical Center of Chinese PLA  
General Hospital, Beijing 100853, China.

<sup>b</sup> Department of Nuclear Medicine & Key Laboratory of Cancer Prevention and  
Intervention, National Ministry of Education, The Second Affiliated Hospital, School of  
Medicine, Zhejiang University, Hangzhou 310009, China

<sup>c</sup> Institute of Translational Medicine, Zhejiang University, Hangzhou 310009, China

<sup>d</sup> State Key Laboratory of Modern Optical Instrumentations, Zhejiang University,  
Hangzhou 310058, China

E-mail addresses: zhoum@zju.edu.cn (Min Zhou); fengyongliu@aliyun.com  
(Fengyong Liu); 11526010@zju.edu.cn (Yangyang Li)

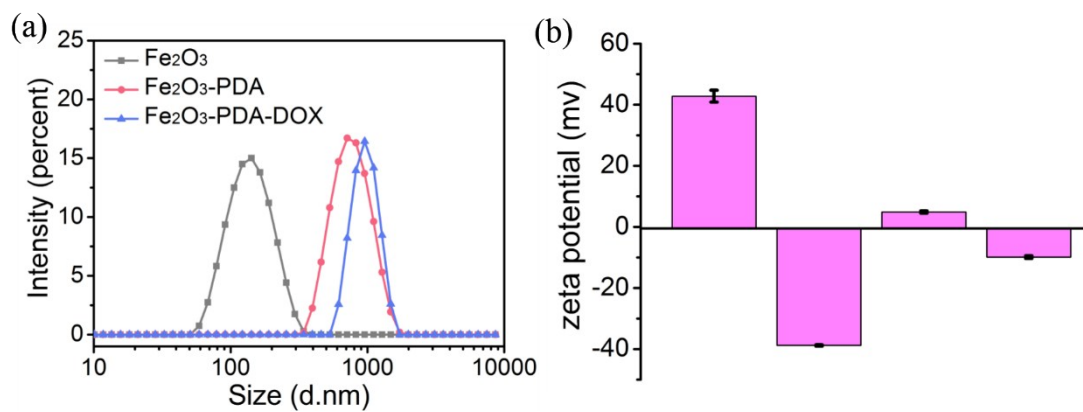

**Figure S1** (a) DLS size distribution of hematite nanoparticles after PDA modification and DOX loading process. (b) Zeta potentials of Fe<sub>2</sub>O<sub>3</sub>, Fe<sub>2</sub>O<sub>3</sub>@PDA, DOX molecules and Fe<sub>2</sub>O<sub>3</sub>-PDA-DOX, respectively.

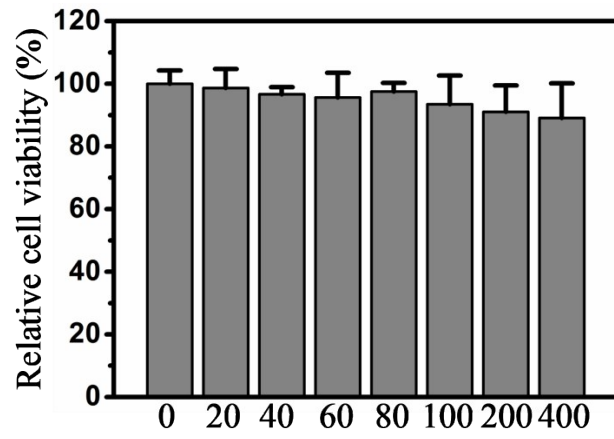

**Figure S2** Relative cell viability of N1S1 hepatoma cell incubated with PDA coated Fe<sub>2</sub>O<sub>3</sub> nanoparticles with varied concentrations for 24 h.

■ Control ■ Lipidol+DOX ■ Lipidol+Fe<sub>2</sub>O<sub>3</sub>-PDA-DOX ■ Lipidol+Fe<sub>2</sub>O<sub>3</sub>-PDA-DOX+NIR

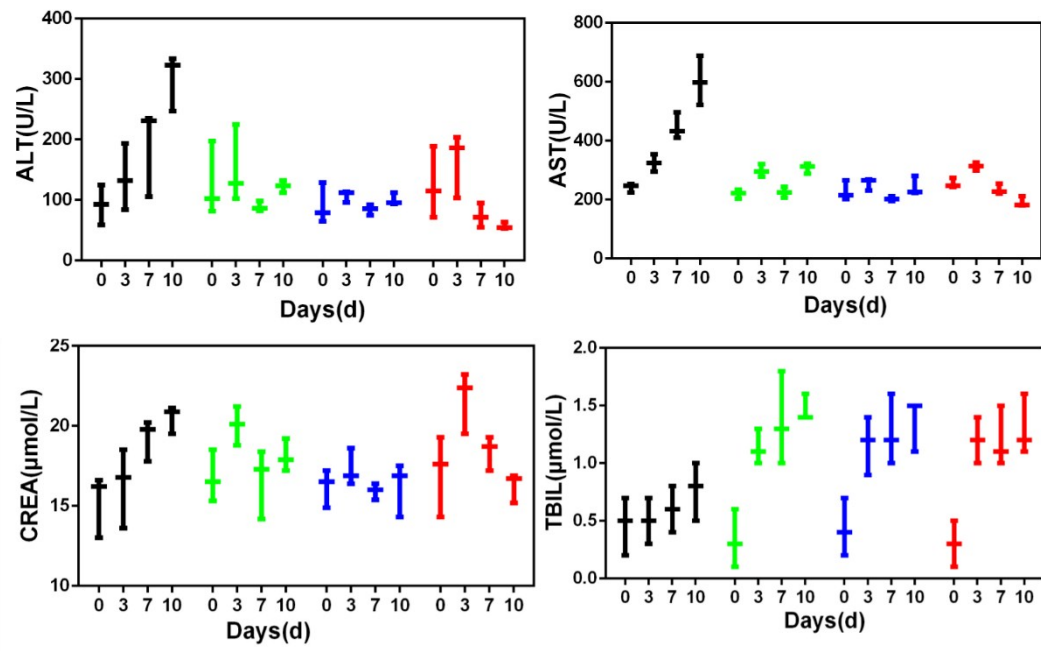

**Figure S3** Liver and kidney toxicity (ALT, AST, CREA, and TBIL) assessment during the therapeutic process
